# Supplementary material
Source: publisher figshare collection journal article supplement (https://asha.figshare.com/articles/dataset/_/27478245)
Supplement: Supplementary file 1 [file 2]

## Sheet: Data
Supplemental material, Clain et al., "Characterizing Physiologic Swallowing Impairment Profiles: A Large-Scale Exploratory Study of Head and Neck Cancer, Stroke, Chronic Obstructive Pulmonary Disease, Dementia, and Parkinson’s Disease," JSLHR, https://doi.org/10.1044/2024_JSLHR-24-00091
Supplemental Material S8. NMOI differences and Confidence intervals for pairwise diagnosis comparisons; bold & underline indicates clinically relevance as NMOI diff. > 0.06. LC = Lip Closure; BH = Bolus Hold; BP/M = Bolus Preparation/Mastication; BT = Bolus Transport; OR = Oral Residue; IPS = Initiation of Pharyngeal Swallow; SPE = Soft Palate Elevation; LE = Laryngeal Elevation; AHE = Anterior H…
		Differences in NMOI scores between pairs of diagnoses
		Oral Components							Pharnygeal Components
Diag. 1	Diag. 2	1–LC	2–BH	3–BP/M	4–BT	5–OR	6–IPS		7–SPE	8–LE	9–AHE	10–EM	11–LVC	12–PSW	13–PC	14–PES	15–TBR	16–PR	17–EC	Pen/Asp
COPD	Dementia	0.132 (0.089, 0.18)	0.138 (0.082, 0.196)	0.204 (0.142, 0.266)	0.169 (0.122, 0.216)	0.041 (0.007, 0.076)	0.088 (0.044, 0.132)		0.004 (-0.011, 0.02)	0.037 (0.004, 0.072)	0.017 (-0.028, 0.065)	0.017 (-0.033, 0.066)	0.004 (-0.041, 0.052)	-0.013 (-0.061, 0.034)	-0.044 (-0.145, 0.059)	-0.01 (-0.045, 0.025)	0.038 (-0.005, 0.081)	0.022 (-0.015, 0.059)	-0.031 (-0.084, 0.021)	0.082 (0.004, 0.161)
COPD	HAN	0.1 (0.072, 0.126)	0.036 (0.005, 0.068)	0.152 (0.113, 0.19)	0.058 (0.026, 0.089)	0.117 (0.094, 0.138)	0.055 (0.026, 0.085)		0.056 (0.043, 0.07)	0.106 (0.083, 0.13)	0.19 (0.158, 0.223)	0.241 (0.205, 0.279)	0.11 (0.08, 0.141)	0.103 (0.07, 0.136)	0.152 (0.08, 0.222)	0.119 (0.095, 0.143)	0.174 (0.148, 0.201)	0.174 (0.15, 0.198)	-0.014 (-0.046, 0.018)	0.199 (0.151, 0.247)
COPD	PD	0.051 (0.017, 0.086)	0.036 (-0.005, 0.078)	0.016 (-0.027, 0.058)	0.114 (0.074, 0.155)	0.042 (0.013, 0.071)	-0.005 (-0.043, 0.031)		0.005 (-0.008, 0.018)	-0.008 (-0.035, 0.02)	0.003 (-0.035, 0.041)	0.004 (-0.039, 0.048)	-0.047 (-0.084, -0.011)	-0.009 (-0.048, 0.029)	-0.025 (-0.1, 0.052)	-0.001 (-0.029, 0.028)	0.025 (-0.005, 0.056)	0.031 (0.003, 0.06)	-0.009 (-0.049, 0.029)	-0.024 (-0.08, 0.036)
COPD	PDwDem	0.179 (0.113, 0.248)	0.18 (0.101, 0.255)	0.171 (0.102, 0.246)	0.249 (0.184, 0.313)	0.088 (0.041, 0.139)	0.121 (0.071, 0.171)		0.017 (-0.004, 0.043)	0.069 (0.024, 0.115)	0.058 (-0.005, 0.121)	0.043 (-0.032, 0.123)	0.047 (-0.014, 0.105)	0.055 (-0.009, 0.117)	0.003 (-0.13, 0.151)	0.052 (0.005, 0.103)	0.102 (0.054, 0.154)	0.066 (0.017, 0.112)	0.038 (-0.029, 0.106)	0.06 (-0.041, 0.166)
COPD	Stroke	0.226 (0.2, 0.252)	0.165 (0.135, 0.193)	0.202 (0.169, 0.234)	0.181 (0.154, 0.208)	0.101 (0.081, 0.121)	0.125 (0.097, 0.151)		0.005 (-0.004, 0.014)	0.061 (0.041, 0.081)	0.056 (0.028, 0.082)	0.043 (0.013, 0.074)	0.045 (0.019, 0.073)	0.036 (0.007, 0.064)	0.128 (0.061, 0.194)	0.003 (-0.017, 0.025)	0.065 (0.041, 0.089)	0.045 (0.023, 0.067)	-0.046 (-0.075, -0.017)	0.179 (0.137, 0.221)
Dementia	HAN	-0.032 (-0.078, 0.01)	-0.101 (-0.158, -0.049)	-0.051 (-0.112, 0.011)	-0.111 (-0.156, -0.065)	0.075 (0.04, 0.107)	-0.032 (-0.072, 0.009)		0.052 (0.035, 0.069)	0.069 (0.035, 0.102)	0.173 (0.129, 0.216)	0.224 (0.175, 0.275)	0.106 (0.061, 0.151)	0.116 (0.07, 0.16)	0.196 (0.097, 0.291)	0.129 (0.098, 0.164)	0.137 (0.098, 0.176)	0.151 (0.116, 0.187)	0.017 (-0.034, 0.067)	0.117 (0.04, 0.192)
Dementia	PD	-0.081 (-0.132, -0.033)	-0.101 (-0.162, -0.042)	-0.188 (-0.253, -0.124)	-0.055 (-0.107, -0.003)	0.001 (-0.038, 0.037)	-0.093 (-0.138, -0.047)		0.001 (-0.017, 0.018)	-0.045 (-0.082, -0.011)	-0.014 (-0.063, 0.033)	-0.013 (-0.07, 0.04)	-0.051 (-0.103, -0.002)	0.004 (-0.047, 0.053)	0.019 (-0.085, 0.121)	0.009 (-0.027, 0.046)	-0.012 (-0.054, 0.032)	0.009 (-0.029, 0.046)	0.022 (-0.033, 0.077)	-0.105 (-0.192, -0.025)
Dementia	PDwDem	0.047 (-0.03, 0.127)	0.042 (-0.05, 0.131)	-0.032 (-0.116, 0.054)	0.08 (0.005, 0.15)	0.046 (-0.008, 0.102)	0.034 (-0.023, 0.091)		0.013 (-0.01, 0.04)	0.032 (-0.017, 0.084)	0.041 (-0.028, 0.111)	0.026 (-0.056, 0.11)	0.043 (-0.027, 0.108)	0.067 (-0.002, 0.138)	0.048 (-0.1, 0.208)	0.062 (0.01, 0.12)	0.065 (0.004, 0.125)	0.043 (-0.013, 0.097)	0.069 (-0.01, 0.149)	-0.022 (-0.141, 0.096)
Dementia	Stroke	0.094 (0.048, 0.137)	0.027 (-0.028, 0.08)	-0.001 (-0.058, 0.056)	0.012 (-0.031, 0.056)	0.06 (0.028, 0.09)	0.037 (0, 0.076)		0.002 (-0.014, 0.015)	0.024 (-0.009, 0.053)	0.038 (-0.004, 0.077)	0.026 (-0.022, 0.07)	0.041 (-0.003, 0.083)	0.049 (0.006, 0.091)	0.173 (0.073, 0.266)	0.013 (-0.019, 0.045)	0.027 (-0.01, 0.065)	0.023 (-0.01, 0.057)	-0.015 (-0.065, 0.034)	0.097 (0.021, 0.167)
HAN	PD	-0.049 (-0.084, -0.015)	0 (-0.039, 0.038)	-0.137 (-0.18, -0.092)	0.056 (0.018, 0.092)	-0.074 (-0.1, -0.049)	-0.061 (-0.093, -0.028)		-0.051 (-0.066, -0.036)	-0.114 (-0.141, -0.087)	-0.187 (-0.223, -0.151)	-0.237 (-0.28, -0.196)	-0.157 (-0.19, -0.122)	-0.112 (-0.147, -0.075)	-0.176 (-0.249, -0.107)	-0.12 (-0.147, -0.093)	-0.149 (-0.176, -0.12)	-0.143 (-0.168, -0.118)	0.005 (-0.03, 0.038)	-0.223 (-0.279, -0.166)
HAN	PDwDem	0.079 (0.014, 0.148)	0.143 (0.067, 0.216)	0.019 (-0.052, 0.091)	0.191 (0.127, 0.252)	-0.029 (-0.075, 0.02)	0.066 (0.017, 0.111)		-0.039 (-0.06, -0.013)	-0.037 (-0.08, 0.007)	-0.132 (-0.193, -0.07)	-0.198 (-0.271, -0.119)	-0.063 (-0.122, -0.005)	-0.048 (-0.111, 0.012)	-0.148 (-0.275, -0.002)	-0.067 (-0.112, -0.017)	-0.072 (-0.12, -0.024)	-0.108 (-0.155, -0.063)	0.052 (-0.013, 0.119)	-0.139 (-0.239, -0.035)
HAN	Stroke	0.126 (0.101, 0.151)	0.128 (0.103, 0.153)	0.05 (0.017, 0.082)	0.123 (0.1, 0.146)	-0.015 (-0.032, 0.002)	0.069 (0.05, 0.089)		-0.051 (-0.063, -0.04)	-0.046 (-0.064, -0.027)	-0.135 (-0.16, -0.111)	-0.198 (-0.227, -0.169)	-0.065 (-0.088, -0.043)	-0.067 (-0.091, -0.043)	-0.023 (-0.081, 0.034)	-0.116 (-0.134, -0.098)	-0.109 (-0.128, -0.091)	-0.129 (-0.146, -0.112)	-0.032 (-0.056, -0.008)	-0.02 (-0.057, 0.017)
PD	PDwDem	0.128 (0.059, 0.2)	0.144 (0.062, 0.221)	0.156 (0.082, 0.232)	0.135 (0.066, 0.202)	0.046 (-0.005, 0.097)	0.127 (0.073, 0.179)		0.012 (-0.009, 0.038)	0.077 (0.031, 0.123)	0.055 (-0.008, 0.121)	0.039 (-0.038, 0.119)	0.094 (0.032, 0.155)	0.064 (-0.002, 0.129)	0.028 (-0.108, 0.175)	0.053 (0.005, 0.105)	0.077 (0.027, 0.129)	0.035 (-0.014, 0.082)	0.047 (-0.024, 0.118)	0.083 (-0.02, 0.189)
PD	Stroke	0.175 (0.14, 0.208)	0.129 (0.091, 0.166)	0.187 (0.148, 0.224)	0.067 (0.033, 0.102)	0.059 (0.035, 0.083)	0.13 (0.1, 0.16)		0.001 (-0.011, 0.011)	0.068 (0.045, 0.092)	0.052 (0.021, 0.084)	0.04 (0.003, 0.077)	0.092 (0.06, 0.124)	0.045 (0.012, 0.078)	0.153 (0.087, 0.221)	0.004 (-0.02, 0.028)	0.039 (0.013, 0.065)	0.014 (-0.009, 0.038)	-0.037 (-0.07, -0.005)	0.203 (0.149, 0.255)
PDwDem	Stroke	0.047 (-0.024, 0.113)	-0.015 (-0.089, 0.062)	0.031 (-0.041, 0.098)	-0.068 (-0.127, -0.005)	0.013 (-0.035, 0.059)	0.003 (-0.04, 0.051)		-0.012 (-0.036, 0.008)	-0.009 (-0.052, 0.033)	-0.003 (-0.062, 0.055)	0 (-0.076, 0.072)	-0.002 (-0.058, 0.056)	-0.018 (-0.078, 0.042)	0.125 (-0.02, 0.255)	-0.049 (-0.097, -0.005)	-0.037 (-0.086, 0.008)	-0.02 (-0.063, 0.026)	-0.084 (-0.152, -0.02)	0.119 (0.019, 0.219)
